# Supplementary material for: A single filament biomechanical study of the enteropathogenic Escherichia coli Type III secretion system reveals a high elastic aspect ratio
Source: Royal Society of Chemistry journal article supplement (doi:10.1039/d3nr01953e), 2023-01-01
Supplement: d3nr01953e1.pdf [file d3nr01953e1.pdf]

## Supporting Information

Single filament biomechanical study of enteropathogenic *Escherichia coli* Type 3  
secretion system reveals high elasticity aspect ratio

Moran Elias-Mordechai<sup>1,‡</sup>, Nofar David<sup>2,‡</sup>, Sonia Oren<sup>2</sup>, Maya Georgia Pelah<sup>a</sup>, Jürgen Jopp<sup>3</sup>, Boris Fichtman<sup>4</sup>, Amnon Harel<sup>4</sup>, Ronen Berkovich<sup>1,3,\*</sup>, and Neta Sal-Man<sup>2,\*</sup>.

### Affiliations

<sup>1</sup> Department of Chemical Engineering, Ben-Gurion University of the Negev, Beer Sheva 8410501, Israel.

<sup>2</sup> Department of Microbiology, Immunology, and Genetics, Ben-Gurion University of the Negev, Beer Sheva 8410501, Israel.

<sup>3</sup> The Ilse Katz Institute for Nanoscale Science and Technology, Ben-Gurion University of the Negev, Beer Sheva 8410501, Israel.

<sup>4</sup> Azrieli Faculty of Medicine, Bar-Ilan University, Safed, Israel.

‡ These authors contributed equally to this work.

### \* Corresponding authors

Ronen Berkovich: [berkovir@bgu.ac.il](mailto:berkovir@bgu.ac.il); Neta Sal-Man: [salmanne@bgu.ac.il](mailto:salmanne@bgu.ac.il)

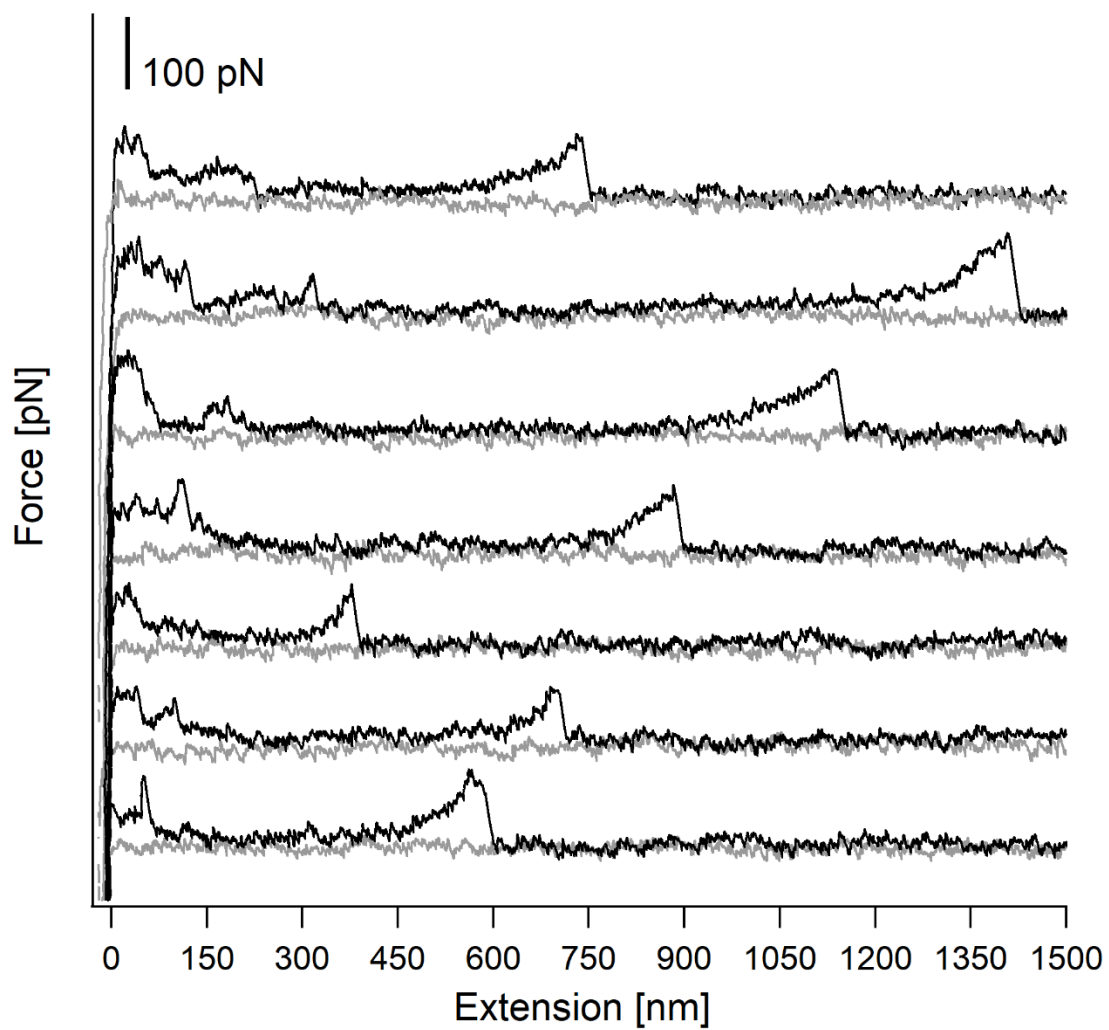

**Figure S1.** Several force extension traces of T3SS filaments pulled from the surface of a bacterium displaying attachment events of single filaments. Forward (pushing) traces are colored in gray and backward (pulling) are colored in black.

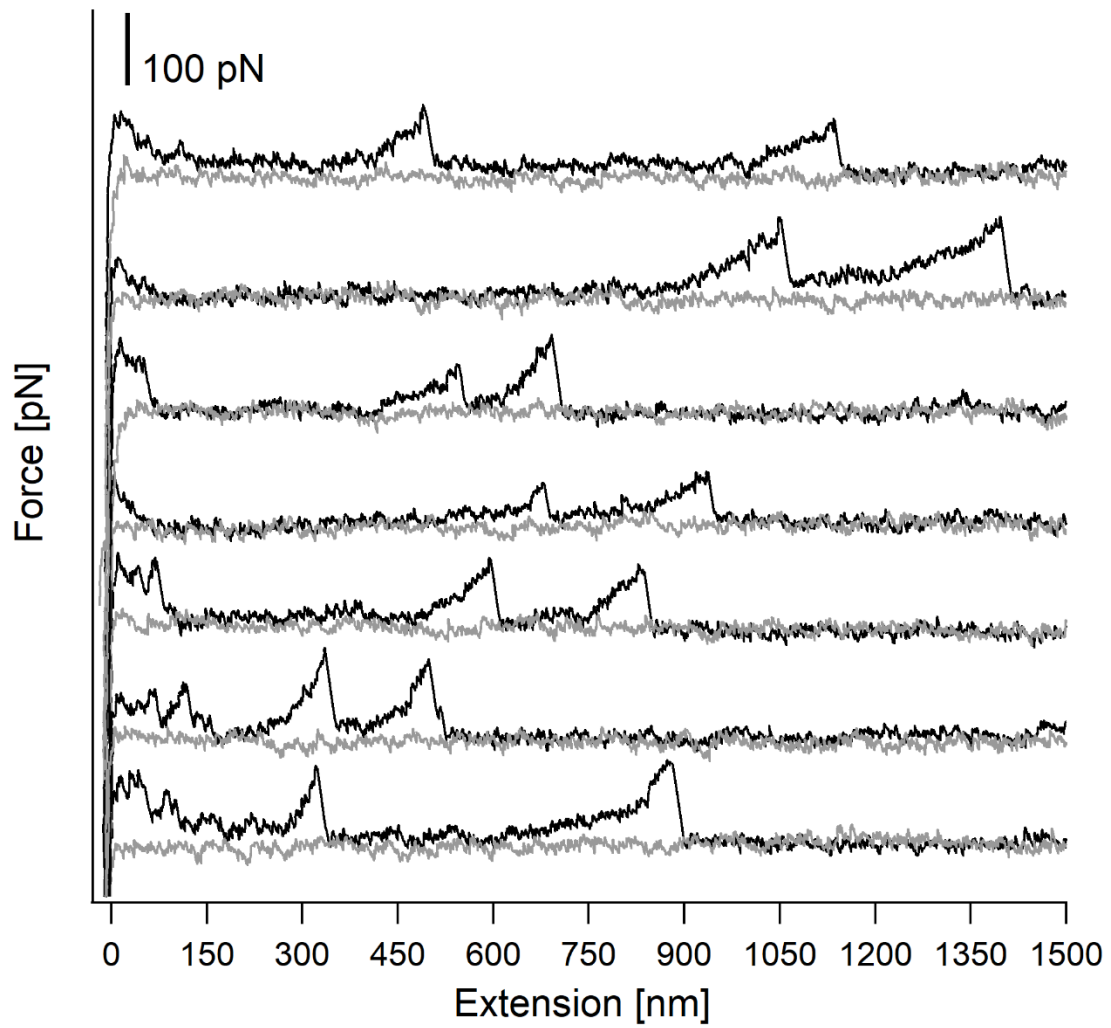

**Figure S2.** Several force extension traces of T3SS filaments pulled from the surface of a bacterium displaying attachment events of two filaments. Forward (pushing) traces are colored in gray and backward (pulling) are colored in black.

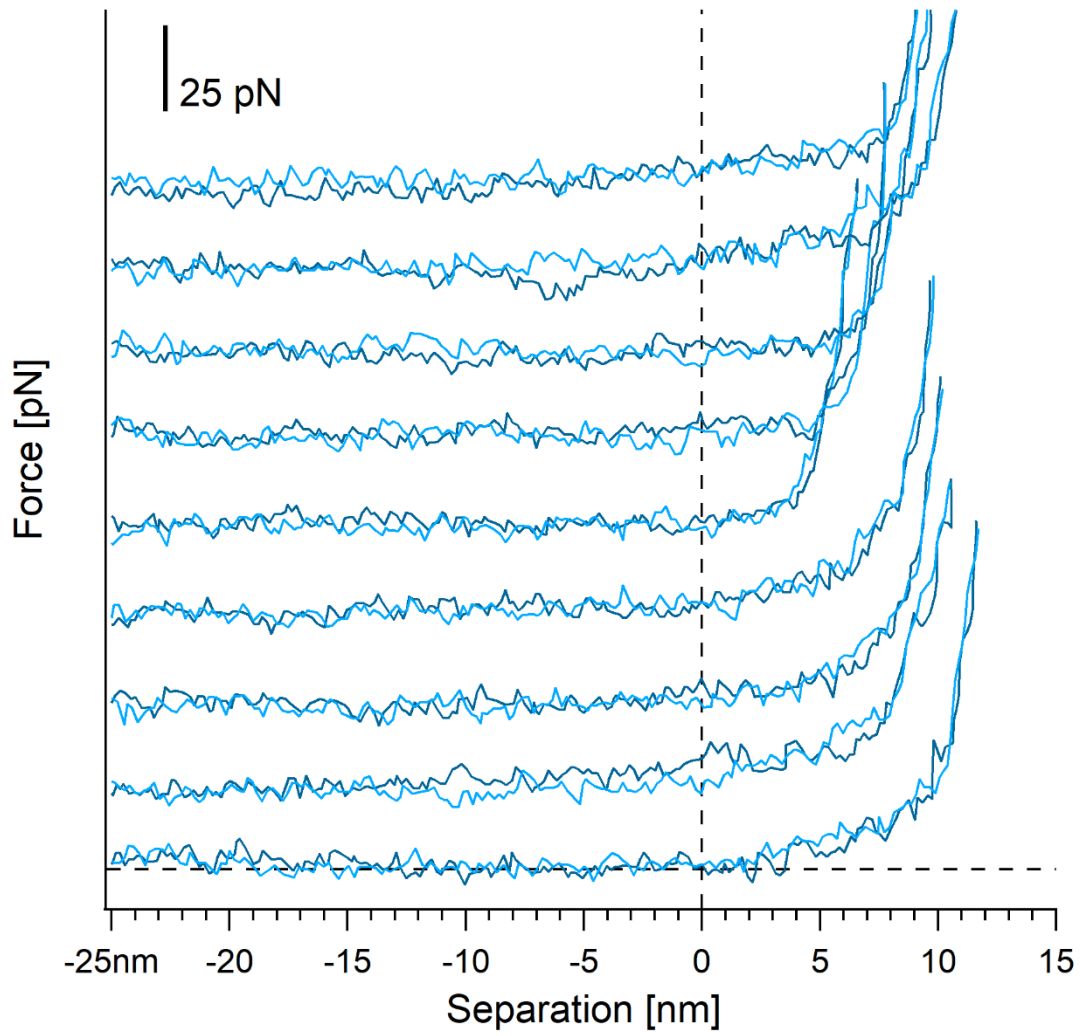

**Figure S3.** Several force separation traces on severed T3SS filaments. Forward (pushing/indenting) traces are colored in dark cyan and backward (retracting) are colored in light-blue.
